# Supplementary material
Source: PubMed Central journal article supplement (PMC4551195)
Supplement: AEM.00890-15_zam999116388so1.pdf [file AEM.00890-15_zam999116388so1.pdf]

Supplemental Materials for:

**Using hybridization chain-reaction fluorescent *in situ* hybridization (HCR-FISH)**

**to track gene expression by both partners during initiation of symbiosis**

K. Nikolakakis, E. Lehnert, M.J. McFall-Ngai\* and E.G. Ruby\*

**Whole-Mount *In Situ* Hybridization of Juvenile Hawaiian Bobtail Squid**  
**using Hybridization Chain Reaction (HCR)**

Modified from protocols by Lee, *et al.* (2009), and Choi, *et al.* (2014).

**A. Solutions Needed**

- 1) Filtered natural seawater or artificial Instant Ocean (Aquarium Systems, Mentor, OH)
- 2) Marine PBS (mPBS) – 50 mM phosphate buffer, pH 7.4; 0.45 M NaCl
- 3) Permeabilization Buffer – mPBS containing 1% (v/v) Tween-20
- 4) 50% Hyb Buffer – DNA Hybridization Buffer (Molecular Instruments; [www.molecularinstruments.org](http://www.molecularinstruments.org)) mixed 1:1 with mPBS
- 5) Probe Wash Buffer – Provided by Molecular Instruments
- 6) DNA Amplification Buffer – Provided by Molecular Instruments
- 7) 5X SSC (750 mM NaCl, 75 mM sodium citrate, pH 7)
- 8) 5X SSC<sub>Tw</sub> – 5X SSC containing 0.05% Tween-20

## **B. Method**

### **1. Collection and Fixation of *E. scolopes***

- [1.1] Collect juvenile squid from hatching table (refer to colonization protocol as needed) and isolate into collection cups. Colonize with desired *V. fischeri* strain.
- [1.2] Anesthetize squid for 2 min by placing into 2% ethanol in filtered seawater.
- [1.3] Under dissecting scope, split and peel back mantle on anterior side. Then carefully pull back the funnel to expose the light organ.
- [1.4] Place dissected squid into 4% paraformaldehyde (PFA) and incubate overnight at 4 °C on shaker to fix. The best vessels to use are 1.5mL screw-cap vials, to prevent leaking at later wash steps.

### **2. Permeabilization by Proteinase K**

Use RNase-free equipment and solutions throughout the remainder of the protocol.

Perform all treatments, hybridizations, and washes in a 500- $\mu$ L volume, on a rotator/shaker, unless otherwise noted.

- [2.1] Wash each sample five times (5 min per wash) with Permeabilization Buffer at room temperature (RT).
- [2.2] Treat with 0.01 mg/mL Proteinase K Permeabilization Buffer at RT for 15-20 minutes. Do not place on shaker or rotator.
- [2.3] Stop the proteinase K digestion with two washes of 2 mg/mL glycine in Permeabilization Buffer.
- [2.4] Post-fix in Permeabilization Buffer with 4% PFA for 1 h at RT on the shaker.
- [2.5] Wash with Permeabilization Buffer five times (5 min per wash).

Note: Permeabilized juveniles can be used immediately, or stored for no longer than 1 week at 4 °C in Permeabilization Buffer.

### **3. Pre-hybridization for Probes**

[3.1] Remove as much of the Permeabilization Buffer as possible from the sample.

Incubate sample in 500 µL of 50% Hyb Buffer at 65 °C for 30 min.

[3.2] Change sample into 500 µL of fresh 50% Hyb Buffer, and incubate at 65 °C for 2.5 h.

Note: Prevent drying during prolonged incubations. When using petri plates, place them in a humidified chamber or seal the cover of the plate with a strip of parafilm.

### **4. Probe Hybridization**

To identify possible artifacts and confounding effects, the following alternate sample preparations should be performed:

- a. Autofluorescence (AF) – Follow protocol but do not add probes (step 4) or hairpins (step 7)
- b. Non-Specific Amplification of hairpins (NSA) – Sample incubated without probes (step 4) but with hairpins included.
- c. Non-Specific Detection of targets (NSD) – This control is applicable only for (i) transgenic (non-endogenous) targets, where a wild-type sample missing the target transcript is treated using the same protocol, and with the test probes and hairpins; or (ii) non-ubiquitous endogenous target transcript, where the locus of expression

is known beforehand, and for which surrounding tissue can give an estimate of NSD in the same sample after treatment.

[4.1] Mix 1 pmol of each probe in 500  $\mu$ L of 50% Hyb buffer at 45 °C for 30 min (*this step should be coordinated with step [3.2] so that they are completed at the same time*).

[4.2] Remove the 50% Hyb buffer from [3.2], and add this probe solution to samples for overnight (16 h) incubation at 45 °C.

## 5. Probe Washes

All solutions used here must be pre-warmed to 45 °C. Probe solution is not reused, and hence discarded at the start of the washes.

[5.1] Wash samples in 500  $\mu$ L Probe Wash Buffer for 15 min at 45 °C.

[5.2] Wash samples in 500  $\mu$ L (75% of Probe Wash Buffer + 25% of 5X SSC) for 15 min at 45 °C.

[5.3] Wash samples in 500  $\mu$ L (50% of Probe Wash Buffer + 50% of 5X SSC) for 15 min at 45 °C.

[5.4] Wash samples in 500  $\mu$ L (25% of Probe Wash Buffer + 75% of 5X SSC) for 15 min at 45 °C.

[5.5] Wash samples 2 times, in 500  $\mu$ L of 5X SSC for 15 min at 45 °C.

[5.6] Wash samples 2 times, in 500  $\mu$ L of 5X SSC for 30 min at 45 °C.

## 6. Pre-hybridization for Hairpins

[6.1] Incubate samples in 500  $\mu$ L of DNA Amplification Buffer at RT for 30 min.

[6.2] Incubate samples in fresh 500  $\mu$ L of DNA Amplification Buffer at RT for 30 min.

[6.3] Aliquot 6 pmol (for every 100  $\mu$ L of DNA Amplification Buffer) of each hairpin in a separate PCR tube.

[6.4] Heat the hairpins to 95  $^{\circ}$ C for 90 sec (e.g., using a PCR machine/thermal cycler).

[6.5] Store the heated hairpins in the dark for 30 min at RT (keep hairpins unmixed).

[6.6] Prepare 100  $\mu$ L of fresh DNA Amplification Buffer equilibrated at RT.

*(Steps [6.2] through [6.6] should be coordinated so that they are completed at the same time for all samples)*

## 7. Hairpin Amplification

[7.1] Mix all hairpins in 100  $\mu$ L of pre-equilibrated DNA Amplification Buffer at RT.

(Final concentration of each hairpin is 60 nM.)

Note: The volume of this incubation can be scaled up if needed (*i.e.*, for high-abundance squid transcripts); however, the hairpin concentration must be kept constant.

[7.2] Remove final wash solution from [6.2] and add the hairpin solution to the samples for an overnight (16 h) incubation at RT.

[7.3] Wrap the sample tubes (or incubation oven) in aluminum foil to keep light out.

## 8. Hairpin Washes

Note: All solutions used here must be pre-equilibrated to RT.

[8.1] Wash samples 4 times, in 500  $\mu$ L of 5X SSC<sub>Tw</sub> for 5 min each at RT

[8.2] Wash samples 2 times, in 500  $\mu$ L of 5X SSC<sub>Tw</sub> for 30 min each at RT

## 9. Imaging

[9.1] Samples can be imaged directly in 5X SSC<sub>Tw</sub>, or stored in 5X SSC<sub>Tw</sub> at 4 °C.

Note: The processed samples can be counterstained with phalloidin or wheat germ agglutinin following standard protocols.

**Table S1**

| <b>Probe Sequences</b>            |                                |                                                            |
|-----------------------------------|--------------------------------|------------------------------------------------------------|
| <u>Probe</u>                      | <u>Hairpin (2)/Fluorophore</u> | <u>Probe Sequence</u>                                      |
| <i>V. fischeri</i> 16S probe #1   | B3 / Alexa488                  | 5'-<br>TGTGCGGGCCCCCGTCAATTCATTTGAGTTTTAATCTTGCGACCGTACTC  |
| <i>V. fischeri</i> 16S probe #2   | B3 / Alexa488                  | 5'-<br>GTAGGTAAGGTTCTTCGCGTTGCATCGAATTAAACCACATGCTCCACCGC  |
| <i>V. fischeri luxA</i> probe #1  | B4 / Alexa546                  | 5'-<br>GAAAGTTGATCTAACAGCAATACATCCTCTGCTTGCCGTACGGGGTGAGC  |
| <i>V. fischeri luxA</i> probe #2  | B4 / Alexa546                  | 5'-<br>CCAACTAAGTACCATTGGCATCCCTTGCCCTTGCTAGCCACTCAGTAGTAC |
| <i>V. fischeri luxA</i> probe #3  | B4 / Alexa546                  | 5'-<br>CTGATCAAGAACTTCCGACATACCTCACGAGCTCTATCCCCATCTTCGTG  |
| <i>V. fischeri luxA</i> probe #4  | B4 / Alexa546                  | 5'-<br>CGCTGAATAATCTCAAGGCACTCTGCAGGAGTTCCAACAGGATTAAGTCC  |
| <i>V. fischeri luxA</i> probe #5  | B4 / Alexa546                  | 5'-<br>TCAGTGCCATTAGCCTCAAACCACAGGTGACGTTAGTAATACCAGTCGC   |
| <i>E. scolopes</i> Actin probe #1 | B1 / Alexa488                  | 5'-<br>CCGTGTTCAATGGGGTATTTCAAGGTAAGGATACCTCTCTTGCTCTGGGC  |
| <i>E. scolopes</i> Actin probe #2 | B1 / Alexa488                  | 5'-<br>CGACACGGAGCTCGTTGTAGAAGGTGTGATGCCAGATTTTCTCCATGTCA  |
| <i>E. scolopes</i> Actin probe #3 | B1 / Alexa488                  | 5'-<br>CTGGATGGCAACATACATGGCGGGAGCGTTGAAGGTCTCGAACATGATTT  |
| <i>E. scolopes</i> Actin probe #4 | B1 / Alexa488                  | 5'-<br>TTCATAGATGGGTACAGTGTGGGTGACACCATCGCCGGAGTCAAGAACAA  |
| <i>E. scolopes</i> Actin probe #5 | B1 / Alexa488                  | 5'-<br>ACGTTCCGGTCAAGATCTTCATGAGGTAGTCAGTAAGATCACGTCCGGCCA |
| <i>E. scolopes</i> HSP90 #1       | B5 / Alexa628                  | 5'-<br>TCCAGATGTTTCTTGCTGCCATATATCCCATCGTTGAGGTGTCTCGCAG   |
| <i>E. scolopes</i> HSP90 #2       | B5 / Alexa628                  | 5'-<br>TATCAGCATCCACTTTCTCCTTCAGGGATTTGATGATAGGGTGGTCGGGG  |
| <i>E. scolopes</i> HSP90 #3       | B5 / Alexa628                  | 5'-<br>TCATCATCTTCCAAAGGTGGGAGTTCAGCATCAACAGAGTCTCCTGCTCC  |

|                                |               |                                                            |
|--------------------------------|---------------|------------------------------------------------------------|
| <i>E. scolopes</i> HSP90 #4    | B5 / Alexa628 | 5'-<br>GCTGGATCAGTTTTTGGAACCTACACCAATTCCGCAATGATACGCAGCGC  |
| <i>E. scolopes</i> HSP90 #5    | B5 / Alexa628 | 5'-<br>TTTTTTTTCCGTTAGCAGTCACCTCTTTCAGACCCAAGCTCTAGCCGCGC  |
| <i>E. scolopes</i> PGRP1/2 #1  | B2 / Alexa546 | 5'-<br>CGTATTTTTACCGCAGTCGAGATGGCGCTCTTTACGAATGATGGGAGGTC  |
| <i>E. scolopes</i> PGRP1/2 #2  | B2 / Alexa546 | 5'-<br>CCGTTTCTTCTTTCGTTGCTGTTCTGCCTACTAGACGAGCGATTTGCTGG  |
| <i>E. scolopes</i> PGRP1/2 #3  | B2 / Alexa546 | 5'-<br>AGGGTAACGCCTTTACAGGTGCCATTTCCGAAACTGCAAGCTGAGGACAT  |
| <i>E. scolopes</i> PGRP1/2 #4  | B2 / Alexa546 | 5'-<br>AACCATTTTGACGGGCATCGGTATAGAAACGACTTCTTTGGGTGGACGCG  |
| <i>E. scolopes</i> PGRP1/2 #5  | B2 / Alexa546 | 5'-<br>GCCGATATCGAACCATCCTCGGTCGTCCATATGAAAGTTCTGGATTTTTTC |
| <i>E. scolopes</i> EsCadDP1 #1 | B2 / Alexa546 | 5'-<br>AGGATCCATGGCTGTGCATGGTTCCTCTGCTGCATACCCTGATGTAATCA  |
| <i>E. scolopes</i> EsCadDP1 #2 | B2 / Alexa546 | 5'-<br>TAGGTCTGAATTCCGGCATCTGGTCATCTCCATCGATCACTGTCAGGTTCA |
| <i>E. scolopes</i> EsCadDP1 #3 | B2 / Alexa546 | 5'-<br>TAGCAGCCATCGAGTCTCCATCTTTCGCTTTGATTTGCATTGCTGGACCC  |
| <i>E. scolopes</i> EsCadDP1 #4 | B2 / Alexa546 | 5'-<br>GTAGACAACCTGTTCCGACCAGGTCCGACTTATCAACGGGTTTCACCATAC |
| <i>E. scolopes</i> EsCadDP1 #5 | B2 / Alexa546 | 5'-<br>GGGGAAAACACTCATAATCGGATCACAAAGCTCATCCCCTCATTGACATGC |



**Fig S1**

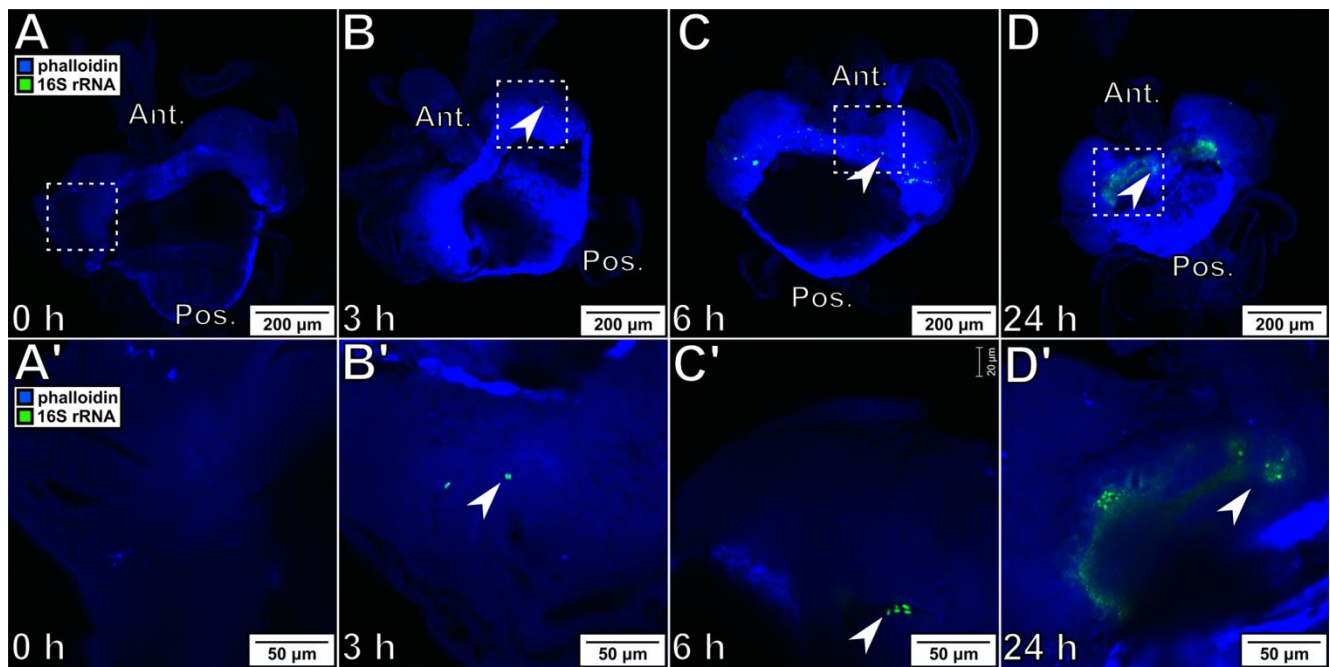

**Figure S1.** Tracking the position of bacteria during colonization. For all images, colonizing bacteria were labeled by probes to the 16S ribosome (green), and squid tissue was stained with 633-phalloidin (blue); panel X' represents a higher magnification (40X) image of the area in the dashed box for the light organ in X (10X). Prior to exposure (**A**, **A'**) no bacteria are visible within the light organ. By 3 h after exposure (**B**, **B'**), bacteria (arrows) have associated with the host tissue, and are visible within the light-organ ducts, located immediately interior of the pores. After 6 h of exposure (**C**, **C'**), bacteria have migrated into the light organ and begun to colonize the crypt space. By 24 h (**D**, **D'**), the host is bioluminescent, and bacteria are visible throughout the crypts.

**Fig S2**

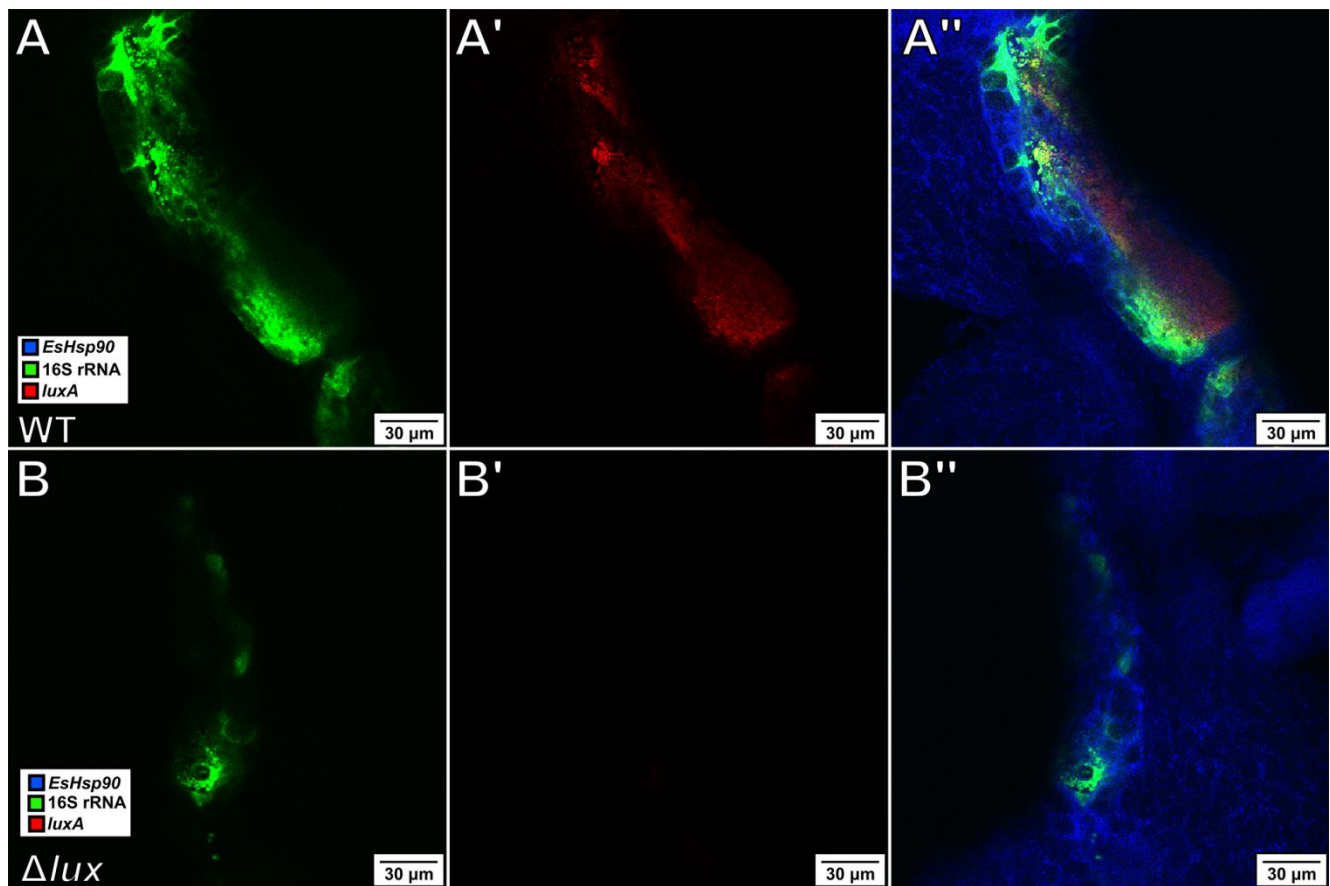

**Figure S2.** Validation of the specificity of the *luxA* probe. For all images, panel X shows labeling of the transcript for the bacterial 16S ribosomal subunit (green), panel X' shows labeling of the *luxA* transcript, and panel X'' shows host tissue labeled for HSP90 transcript (blue) overlaid with the two bacterial labels. **(A)** Wild-type *V. fischeri* were used to colonize squid, and samples were collected at 24 h post-inoculation, at which time the symbionts were fully bioluminescence. **(B)** Alternatively,  $\Delta lux$  *V. fischeri* were used to colonize squid, and sampled at the same time point.

## References

1. **Lee PN, McFall-Ngai MJ, Callaerts P, de Couet HG.** 2009. Whole-mount *in situ* hybridization of Hawaiian bobtail squid (*Euprymna scolopes*) embryos with DIG-labeled riboprobes: II. Embryo preparation, hybridization, washes, and immunohistochemistry. Cold Spring Harb Protoc 2009:pdb prot5322.
2. **Choi HM, Beck VA, Pierce NA.** 2014. Next-generation *in situ* hybridization chain reaction: higher gain, lower cost, greater durability. ACS Nano **8**:4284-4294.
